# Supplementary material for: Crystal facets controlled synthesis of graphene@TiO2nanocomposites by a one-pot hydrothermal process
Source: Royal Society of Chemistry journal article supplement (doi:10.1039/c1ce06193c), 2011-12-21
Supplement: c1ce06193c.pdf [file c1ce06193c.pdf]

## Electronic Supplementary Information (ESI)

### Crystal Facets Controlled Synthesis of Graphene@TiO<sub>2</sub> Nanocomposites by One-Pot Hydrothermal Process

Zeyan Wang,<sup>a</sup> Baibiao Huang,<sup>\*a</sup> Ying Dai,<sup>b</sup> Yuanyuan Liu,<sup>a</sup> Xiaoyang Zhang,<sup>a</sup> Xiaoyan Qin,<sup>a</sup> Junpeng Wang,<sup>a</sup> Zhaoke Zheng,<sup>a</sup> Hefeng Cheng<sup>a</sup>

<sup>a</sup> State Key Laboratory of Crystal Materials and <sup>b</sup> School of Physics,

Shandong University, Jinan 250100, China

\*e-mail: bbhuang@sdu.edu.cn

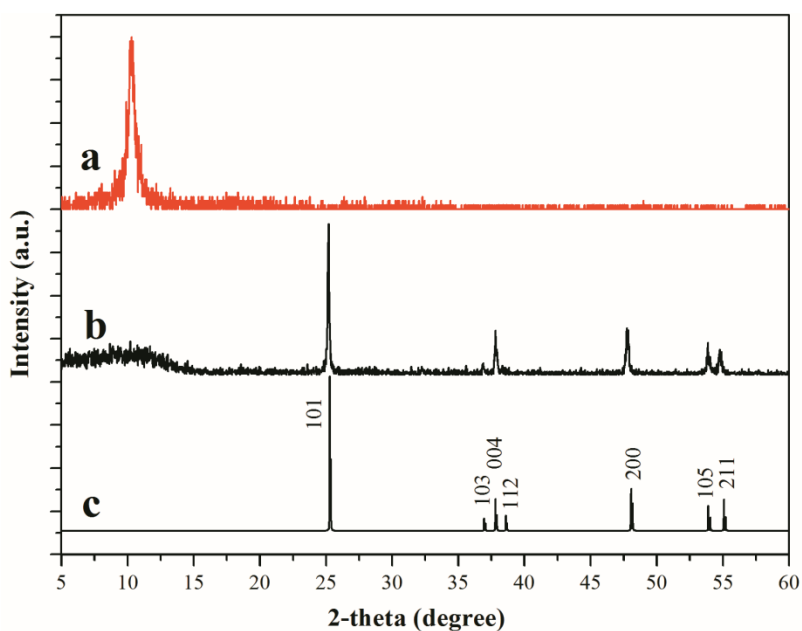

**Figure S1.** XRD patterns of (a) as-prepared GO, (b) graphene@ TiO<sub>2</sub> nanocomposites prepared by a hydrothermal reaction with aqueous solutions containing (NH<sub>4</sub>)<sub>2</sub>TiF<sub>6</sub> (0.03 M) and GO at 160 °C for 4 h, (c) standard anatase TiO<sub>2</sub> (JCPDS 21-1272).

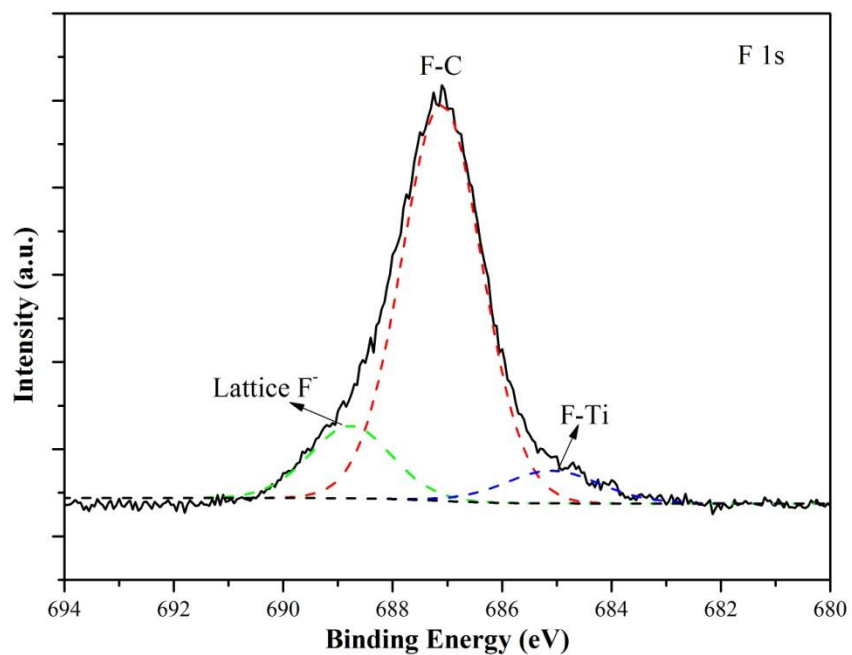

**Figure S2.** High-resolution F 1s XPS spectra of graphene@ TiO<sub>2</sub> nanocomposites prepared by a hydrothermal reaction with aqueous solutions containing (NH<sub>4</sub>)<sub>2</sub>TiF<sub>6</sub> (0.03 M) and GO at 160 °C for 4 h.

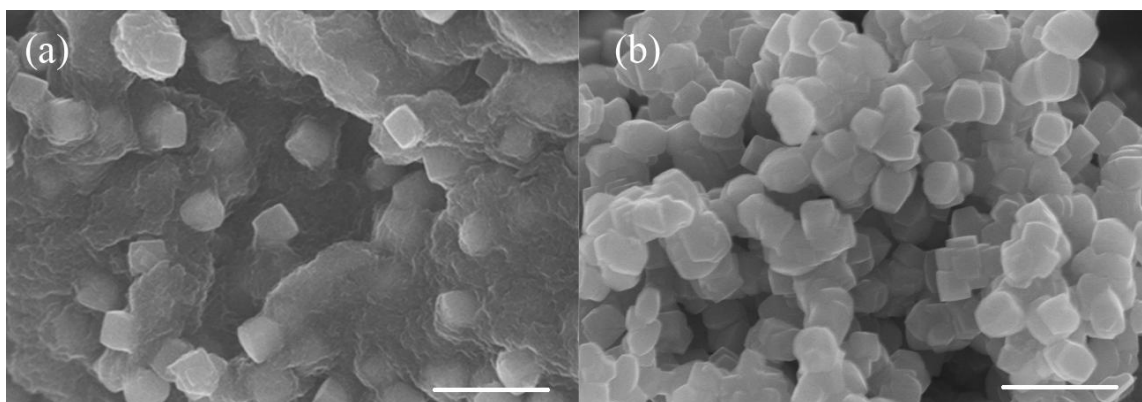

**Figure S3.** SEM images for the samples prepared from  $(\text{NH}_4)_2\text{TiF}_6$  precursor solutions (a) with and (b) without GO by hydrothermal methods under identical conditions ( $[(\text{NH}_4)_2\text{TiF}_6]=0.03$  M,  $160$  °C for 4 h). The scale bar is  $1$   $\mu\text{m}$ .

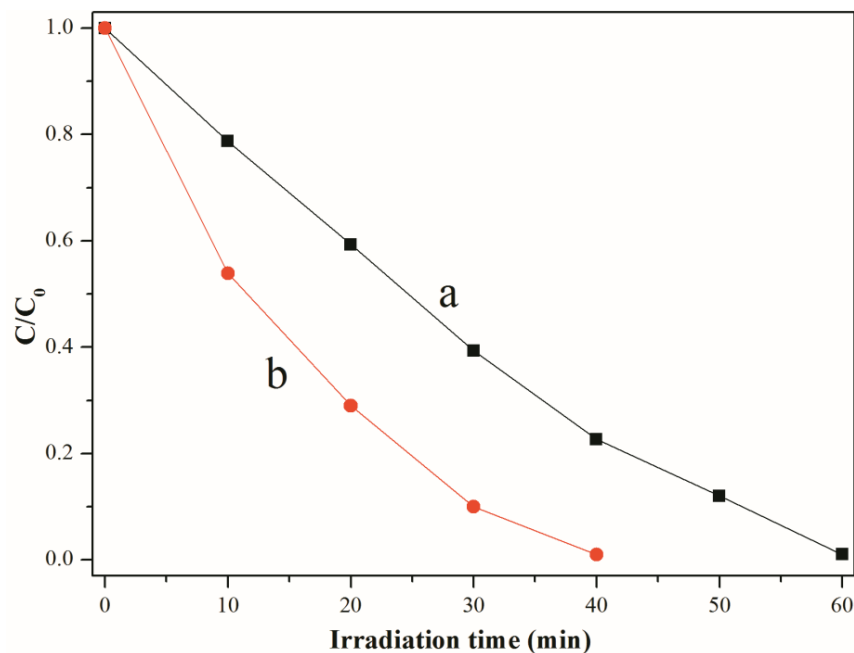

**Figure S4.** Photodegradation of Mb dye as a function of irradiation time over (a) graphene@P25 and (b) graphene@TiO<sub>2</sub> nanocomposites prepared by a hydrothermal reaction with aqueous solutions containing (NH<sub>4</sub>)<sub>2</sub>TiF<sub>6</sub> (0.03 M) and GO at 160 °C for 4 h.
